# Supplementary material for: Surface modification of MnO2 and carbon nanotubes using organic dyes for nanotechnology of electrochemical supercapacitors
Source: Royal Society of Chemistry journal article supplement (doi:10.1039/c3ta12458d), 2013-01-01
Supplement: c3ta12458d.pdf [file c3ta12458d.pdf]

## Supporting information

Surface modification of MnO<sub>2</sub> and carbon nanotubes using organic dyes for nanotechnology of electrochemical supercapacitors.

Yaohui Wang, Yangshuai Liu and Igor Zhitomirsky\*

Department of Materials Science and Engineering  
McMaster University  
1280 Main Street West  
Hamilton, Ontario, Canada  
L8S 4L7

\*E-mail: [zhitom@mcmaster.ca](mailto:zhitom@mcmaster.ca)  
Phone: 1- (905) 525 – 9140

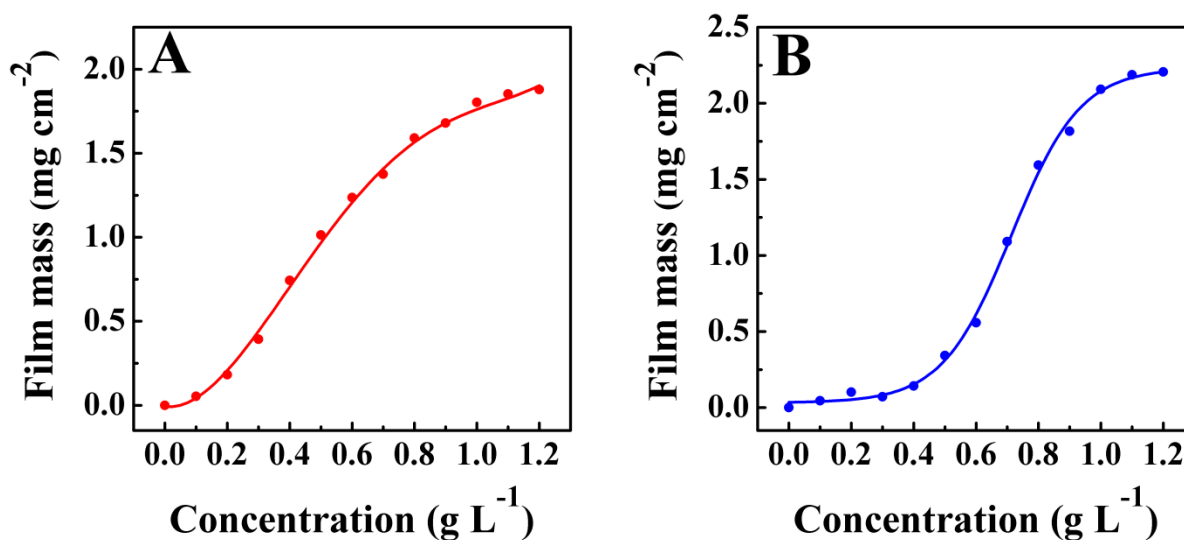

Fig.S1 Film mass for anodic deposits versus (A) PV and (B) CP concentration in 2.4 g L<sup>-1</sup> MWCNT suspensions at a deposition voltage of 100 V and a deposition time of 2 min.

The data indicated that the deposition yield of MWCNT from 2.4 g L<sup>-1</sup> MWCNT suspensions was higher than that for 1.2 g L<sup>-1</sup> MWCNT suspensions (Figure 1A-B) at PV and CP concentrations of 1.2 g L<sup>-1</sup>. The result is in agreement with Hamaker equation (O. O. Van der Biest and L. J. Vandeperre, *Annual Review of Materials Science*, 1999, **29**, 327), describing the deposition yield dependence on particle concentration in the suspensions.

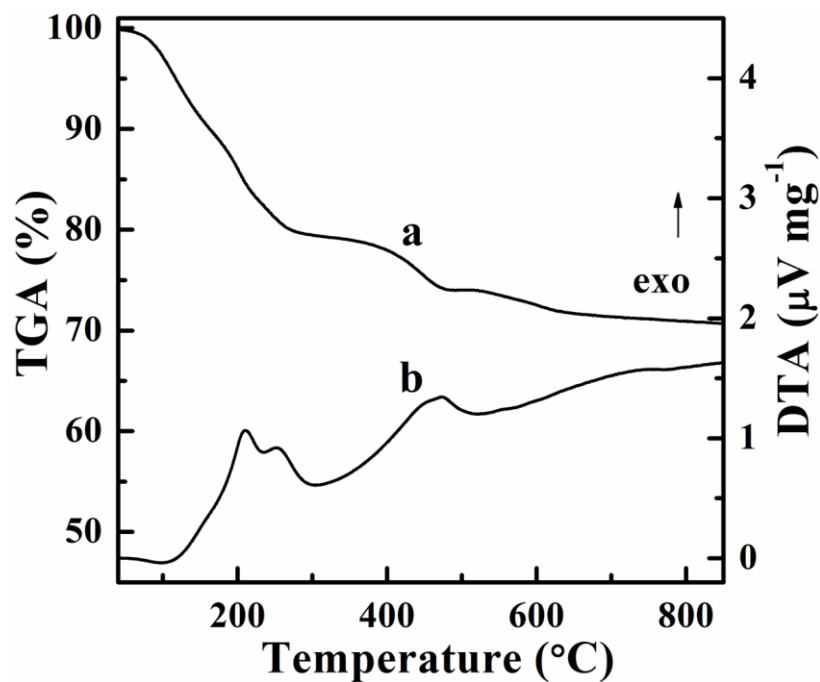

Fig.S2 (a)TGA and (b)DTA data for the film prepared from suspension, containing  $9 \text{ g L}^{-1}$   $\text{MnO}_2$ ,  $1.2 \text{ g L}^{-1}$  PV and  $1.2 \text{ g L}^{-1}$  MWCNT.

The additional mass loss in the TGA data and exothermic peaks in the corresponding DTA data (Fig.S2) compared to pure  $\text{MnO}_2$  (Fig.6D(a,c)) are related to burning out of MWCNT and indicate the formation of composite  $\text{MnO}_2$  - MWCNT film.

This data coupled with the data for the another composite (Fig.6D(b,d)) indicated that composite films can be prepared from different suspensions.
